# Supplementary material
Source: PubMed Central journal article supplement (PMC1941498)

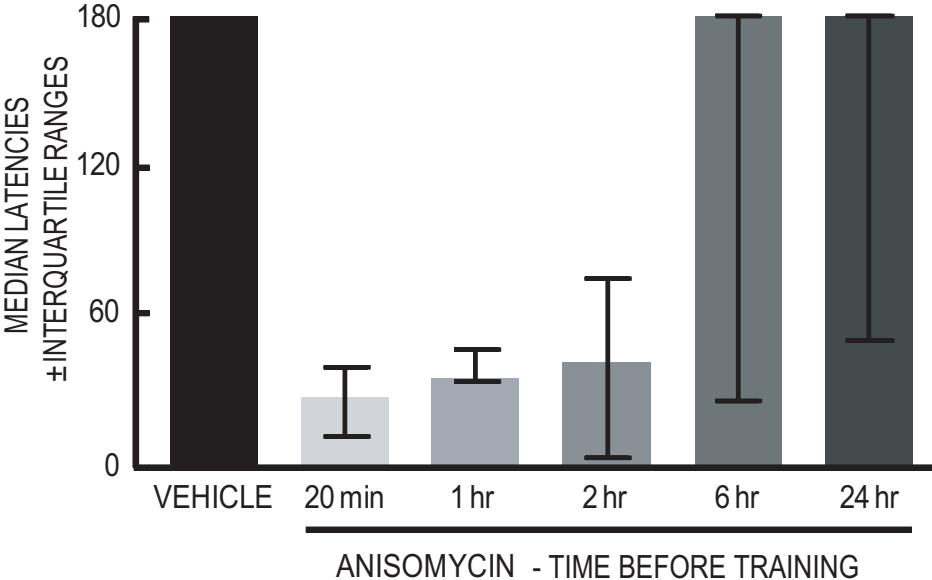

Supplement: pnas_0705195104_1.pdf [file pnas_0705195104_1.pdf]
